# Supplementary material
Source: publisher figshare collection journal article supplement (https://acs.figshare.com/ndownloader/files/3801028)
Supplement: Supplementary file 1 [file 3801028]

## Supporting Information for

### Preparation of MIL-53(Fe)-Reduced Graphene Oxide Nanocomposites by a Simple Self-Assembly Strategy for Increasing Interfacial Contact: Efficient Visible Light Photocatalysts

*Ruowen Liang, Lijuan Shen, Fenfen Jing, Na Qin, Ling Wu\**

State key laboratory of photocatalysis on energy and environment, Fuzhou University,

Fuzhou 350002, P. R. China

\* Corresponding author: Prof. Ling Wu

E-mail: wuling@fzu.edu.cn

Phone: +86-591-83779362

Fax: +86-591-83779105.

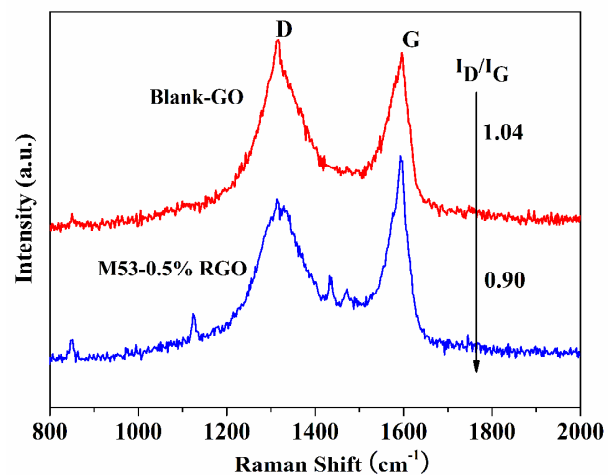

**Figure S1.** Raman spectra of original GO and M53–0.5% RGO.

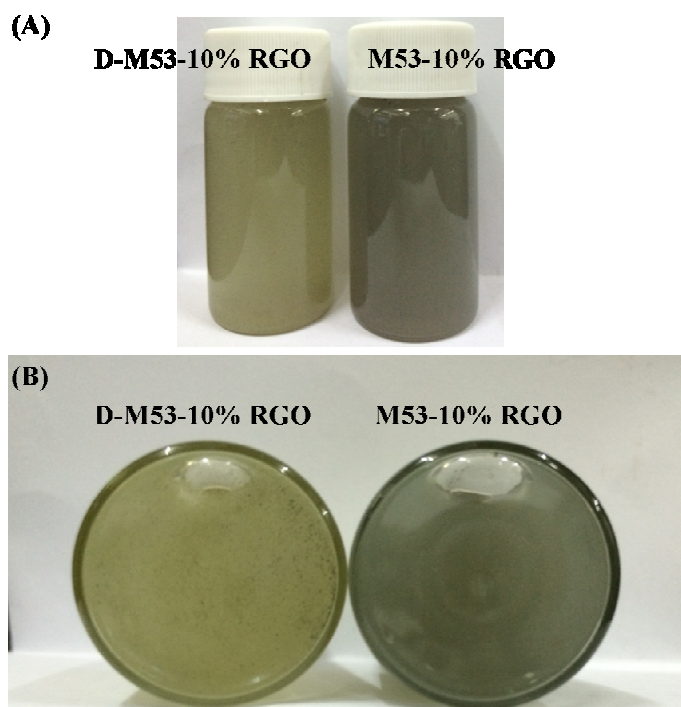

**Figure S2.** Photograph showing (A) the suspension of M53–10% RGO and D–M53–10% RGO; (B) the bottom of the vials.

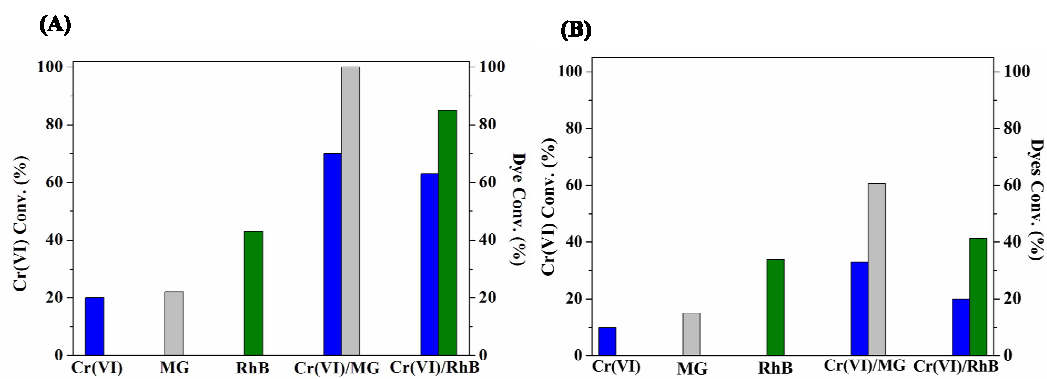

**Figure S3.** Photocatalytic activities of (A) M53–0.5% RGO and (B) D–M53–0.5% RGO for the simultaneous photocatalytic reduction of Cr(VI) and degradation of dyes. Reaction conditions: 40 mg of photocatalyst, 40 mL of 20 mg·L<sup>-1</sup> Cr(VI)/dye, air atmosphere, pH 7.

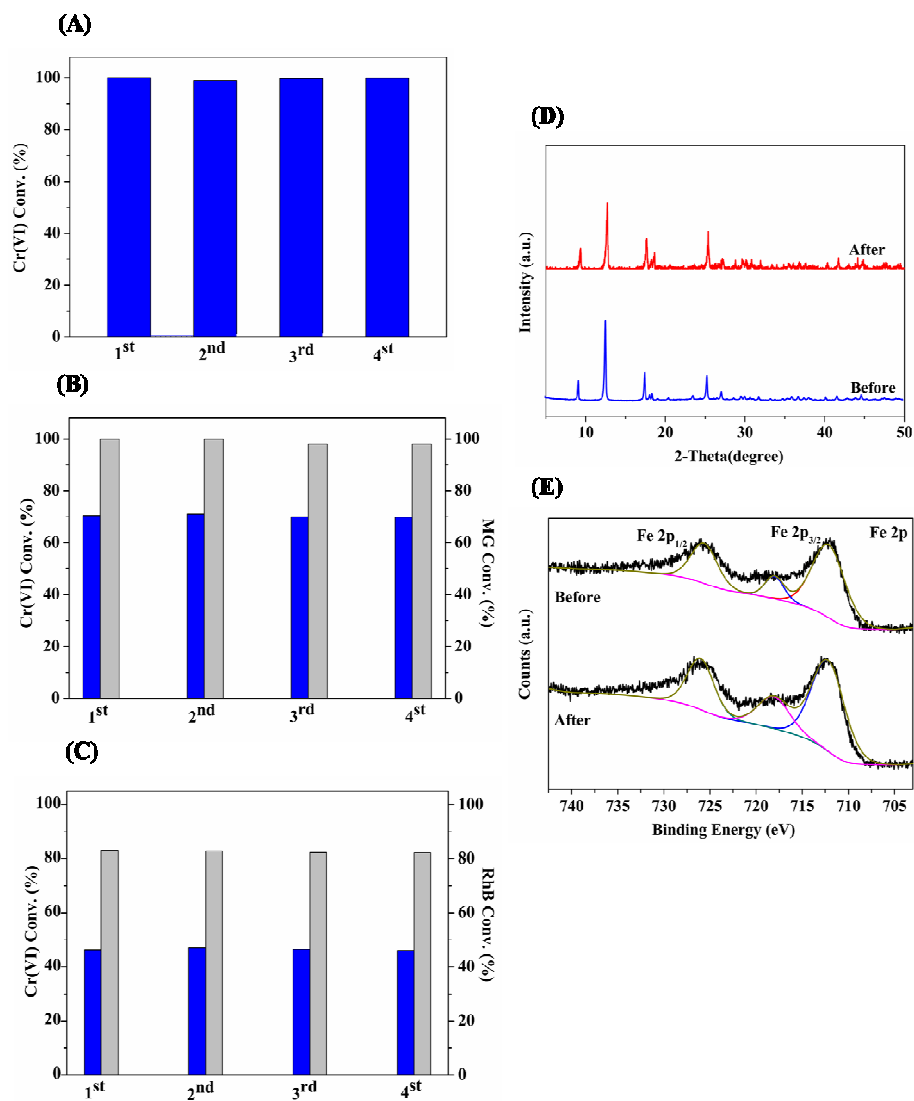

**Figure S4.** Reuse of M53–0.5% RGO for the (A) photocatalytic reduction of Cr(VI); (B,C) simultaneous photocatalytic reduction of Cr(VI) and degradation of dyes for four successive cycles, and (D) XRD patterns, (E) XPS spectra of M53–0.5% RGO before and after the catalytic reaction.

**Table S1.** The concentration of Fe(III) during the reaction. Reaction conditions: 40 mg of M53–0.5% RGO, 40 mL of 20 mg·L<sup>-1</sup> Cr(VI), 5 mg of ammonium oxalate, air atmosphere, pH 4.

| Irradiation time (min) | Fe(III) concentration (ppm) |
|------------------------|-----------------------------|
| 40 (Dark adsorption)   | 2.145                       |
| 40                     | 1.982                       |
| 80                     | 2.074                       |

**Table S2.** The concentration of Fe(III) during the reaction. Reaction conditions: 40 mg of M53–0.5% RGO, 40 mL of 20 mg·L<sup>-1</sup> Cr(VI)/MG, air atmosphere, pH 7.

| Irradiation time (min) | Fe(III) concentration (ppm) |
|------------------------|-----------------------------|
| 40 (Dark adsorption)   | 0.303                       |
| 150                    | 0.315                       |
| 300                    | 0.293                       |

**Table S3.** The concentration of Fe(III) during the reaction. Reaction conditions: 40 mg of M53–0.5% RGO, 40 mL of 20 mg·L<sup>-1</sup> Cr(VI)/RhB, air atmosphere, pH 7.

| Irradiation time (min) | Fe(III) concentration (ppm) |
|------------------------|-----------------------------|
| 40 (Dark adsorption)   | 0.424                       |
| 150                    | 0.393                       |
| 300                    | 0.429                       |

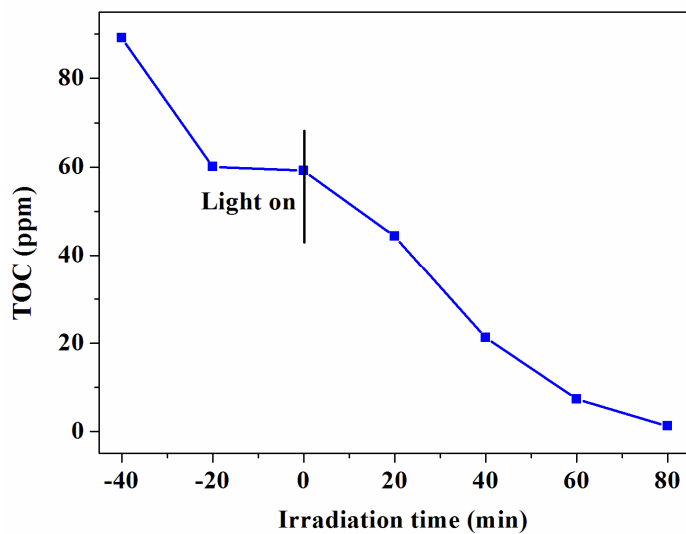

**Figure S5.** Time-course of TOC during irradiation in the presence of ammonium oxalate. Reaction conditions: 40 mg of M53–0.5% RGO, 40 mL of 20 mg·L<sup>-1</sup> Cr(VI), 5 mg of ammonium oxalate, air atmosphere, pH 4.

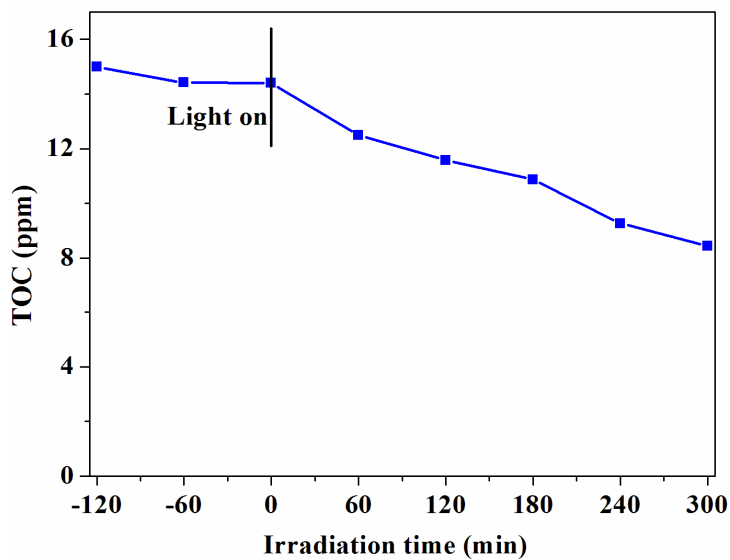

**Figure S6.** Time-course of TOC during irradiation in the binary systems of Cr(VI)/MG. Reaction conditions: 40 mg of M53–0.5% RGO, 40 mL of 20 mg·L<sup>-1</sup> Cr(VI)/MG, air atmosphere, pH 7.

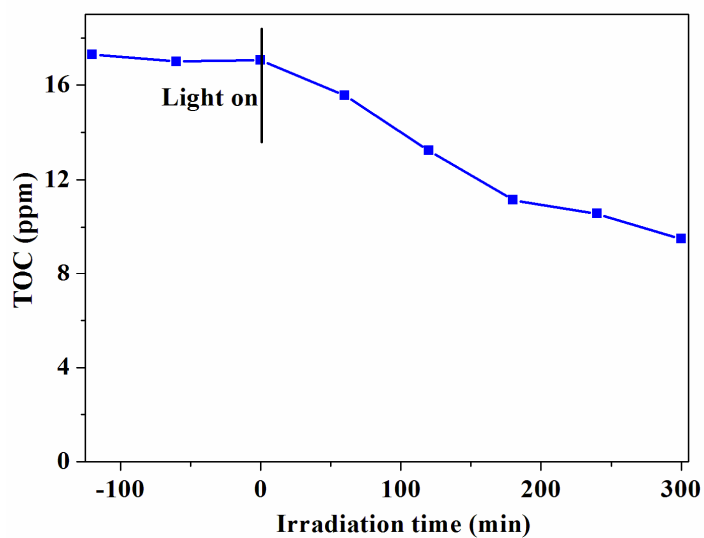

**Figure S7.** Time-course of TOC during irradiation in the binary systems of Cr(VI)/RhB. Reaction conditions: 40 mg of M53-0.5% RGO, 40 mL of 20 mg·L<sup>-1</sup> Cr(VI)/RhB, air atmosphere, pH 7.

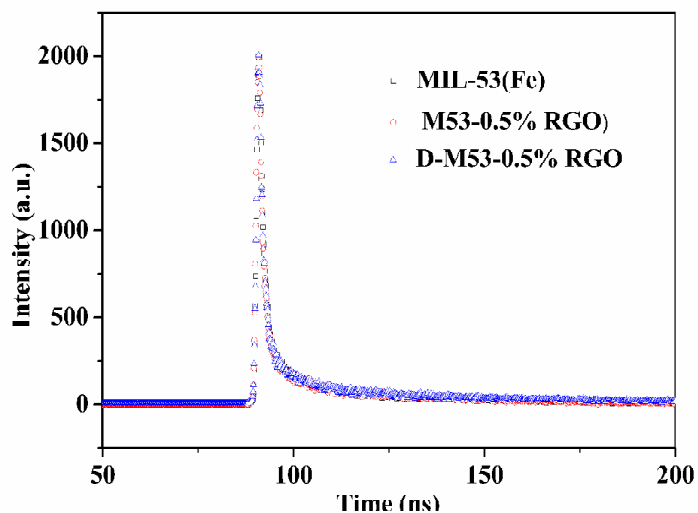

**Figure S8.** The photoluminescent (PL) lifetime of the samples.

**Table S4.** The photoluminescent (PL) lifetime of MIL-53(Fe), M53–0.5% RGO and D–M53–0.5% RGO.

| Sample         | PL lifetime (ns) |      | Relative proportion (%) |
|----------------|------------------|------|-------------------------|
| MIL-53(Fe)     | T <sub>1</sub>   | 1.22 | 26.39                   |
|                | T <sub>2</sub>   | 12.9 | 31.92                   |
|                | T <sub>3</sub>   | 73.3 | 41.70                   |
| M53–0.5% RGO   | T <sub>1</sub>   | 1.23 | 26.42                   |
|                | T <sub>2</sub>   | 14.3 | 32.10                   |
|                | T <sub>3</sub>   | 76.1 | 41.48                   |
| D–M53–0.5% RGO | T <sub>1</sub>   | 1.24 | 26.46                   |
|                | T <sub>2</sub>   | 14.0 | 31.86                   |
|                | T <sub>3</sub>   | 77.6 | 41.68                   |

**Table S5.** Active species trapping experiments using different radical scavengers for the photocatalytic degradation of dyes over M53–0.5% RGO (tert-butyl alcohol (TBA) as a scavenger for hydroxyl radicals, ammonium oxalate (AO) as a scavenger for photogenerated holes).

| Pollutants | MG   | MG/Cr(VI) | RhB  | RhB /Cr(VI) | Radical scavenger |
|------------|------|-----------|------|-------------|-------------------|
| Dye        | 22.2 | 100.0     | 43.0 | 83.1        | None              |
| removal    | 22.0 | 98.1      | 40.1 | 61.7        | TBA               |
| (%)        | 4.3  | 38.5      | 12.8 | 13.2        | AO                |
